# Supplementary material
Source: PubMed Central journal article supplement (PMC3711403)
Supplement: NIHMS410938-supplement-1.pdf [file NIHMS410938-supplement-1.pdf]

**Table S1. Unadjusted and adjusted NMSC recurrence rates five years after each treatment**

| Treatment group | Recurrence rate [95% Confidence Interval] five years after treatment |                                   |                                              |                                                     |                                   |                                              |                                                     |                                   |                                              |
|-----------------|----------------------------------------------------------------------|-----------------------------------|----------------------------------------------|-----------------------------------------------------|-----------------------------------|----------------------------------------------|-----------------------------------------------------|-----------------------------------|----------------------------------------------|
|                 | UNIVERSITY SITE<br>(30 recurrences in 857 tumors)                    |                                   |                                              | VA<br>(23 recurrences in 631 tumors)                |                                   |                                              | ENTIRE SAMPLE<br>(53 recurrences in 1488 tumors)    |                                   |                                              |
|                 | Number of recurrences /number of tumors at baseline                  | Unadjusted 5-year recurrence rate | Adjusted 5-year recurrence rate <sup>a</sup> | Number of recurrences /number of tumors at baseline | Unadjusted 5-year recurrence rate | Adjusted 5-year recurrence rate <sup>a</sup> | Number of recurrences /number of tumors at baseline | Unadjusted 5-year recurrence rate | Adjusted 5-year recurrence rate <sup>a</sup> |
| Destruction     | 14 / 229                                                             | 6.2% [2.5, 9.6]                   | 4.3% [0.9, 7.6]                              | 3 / 132                                             | 2.8% [0, 6.0]                     | 2.7% [0, 5.8]                                | 17 / 361                                            | 4.9% [2.3, 7.4]                   | 3.8%[1.4, 6.1]                               |
| Excision        | 8 / 247                                                              | 2.6% [0.3, 4.9]                   | 2.6% [0.2, 4.8]                              | 14 / 324                                            | 4.2% [1.7, 6.6]                   | 3.8%[1.4, 6.2]                               | 22 / 571                                            | 3.5% [1.8, 5.2]                   | 3.3%[1.6, 4.9]                               |
| Mohs surgery    | 8 / 381                                                              | 1.9% [0.2, 3.5]                   | 1.8% [0.1, 3.5]                              | 6 / 175                                             | 2.4% [0, 5.1]                     | 1.4% [0, 3.2]                                | 14 / 556                                            | 2.1% [0.6, 3.5]                   | 1.7%[0.4, 3.0]                               |

<sup>a</sup> All models adjusted for history of HIV, multiple NMSCs at presentation, tumor type (BCC or SCC), whether the tumor was histopathologically superficial or *in situ*, tumor in H-zone of the face, > 2 annual visits to dermatology, and in the entire sample, clinical site
